# Supplementary material for: Design, Development, Evaluation, and In Vivo Performance of Buccal Films Embedded with Paliperidone-Loaded Nanostructured Lipid Carriers
Source: MDPI journal article supplement (doi:10.3390/pharmaceutics15112530), 2023-10-25
Supplement: s1 [file s1]

# Design, Development, Evaluation and In Vivo Performance of Buccal Films Embedded with Paliperidone Loaded Nanostructured Lipid Carriers

**Table S1.** Concentrations of various factors used for optimization.

| Formulation           | Actual values of factors         |                                     |                                   |
|-----------------------|----------------------------------|-------------------------------------|-----------------------------------|
|                       | Solid: liquid lipid ratio, $X_1$ | Surfactant concentration (%), $X_2$ | Ultrasonication time (min), $X_3$ |
| NL1                   | 7:3                              | 2                                   | 20                                |
| NL2                   | 8:2                              | 2                                   | 20                                |
| NL3                   | 7:3                              | 2                                   | 10                                |
| NL4                   | 7.5:2.5                          | 1                                   | 20                                |
| NL5                   | 7.5:2.5                          | 2                                   | 15                                |
| NL6                   | 7.5:2.5                          | 3                                   | 20                                |
| NL7                   | 7.5:2.5                          | 1                                   | 10                                |
| NL8                   | 7.5:2.5                          | 2                                   | 15                                |
| NL9                   | 8:2                              | 3                                   | 15                                |
| NL10                  | 7.5:2.5                          | 3                                   | 10                                |
| NL11                  | 7.5:2.5                          | 2                                   | 15                                |
| NL12                  | 7:3                              | 3                                   | 15                                |
| NL13                  | 7.5:2.5                          | 2                                   | 15                                |
| NL14                  | 7.5:2.5                          | 2                                   | 15                                |
| NL15                  | 8:2                              | 1                                   | 15                                |
| NL16                  | 8:2                              | 2                                   | 10                                |
| NL17                  | 7:3                              | 1                                   | 15                                |
| Optimized formulation | 7.57:2.43                        | 2.18                                | 14.23                             |

**Table S2.** ANOVA for Quadratic model for particle size.

| Source         | Sum of Squares | df | Mean Square | F-value | p-value |                 |
|----------------|----------------|----|-------------|---------|---------|-----------------|
| Model          | 1.794E+05      | 9  | 19932.00    | 13.28   | 0.0013  | significant     |
| A-X1           | 13773.85       | 1  | 13773.85    | 9.18    | 0.0191  |                 |
| B-X2           | 14449.15       | 1  | 14449.15    | 9.63    | 0.0172  |                 |
| C-X3           | 0.0242         | 1  | 0.0242      | 0.0000  | 0.9969  |                 |
| AB             | 10541.13       | 1  | 10541.13    | 7.03    | 0.0329  |                 |
| AC             | 1334.08        | 1  | 1334.08     | 0.8891  | 0.3771  |                 |
| BC             | 783.72         | 1  | 783.72      | 0.5223  | 0.4933  |                 |
| A <sup>2</sup> | 67361.92       | 1  | 67361.92    | 44.89   | 0.0003  |                 |
| B <sup>2</sup> | 48626.22       | 1  | 48626.22    | 32.41   | 0.0007  |                 |
| C <sup>2</sup> | 10011.71       | 1  | 10011.71    | 6.67    | 0.0363  |                 |
| Residual       | 10503.08       | 7  | 1500.44     |         |         |                 |
| Lack of Fit    | 3865.81        | 3  | 1288.60     | 0.7766  | 0.5650  | not significant |
| Pure Error     | 6637.27        | 4  | 1659.32     |         |         |                 |
| Cor Total      | 1.899E+05      | 16 |             |         |         |                 |

**Table S3.** ANOVA for Quadratic model for entrapment efficiency.

| Source         | Sum of Squares | df | Mean Square | F-value | p-value  |             |
|----------------|----------------|----|-------------|---------|----------|-------------|
| Model          | 1364.78        | 9  | 151.64      | 17.23   | 0.0006   | significant |
| A-X1           | 104.84         | 1  | 104.84      | 11.91   | 0.0107   |             |
| B-X2           | 1.84           | 1  | 1.84        | 0.2094  | 0.6611   |             |
| C-X3           | 84.89          | 1  | 84.89       | 9.64    | 0.0172   |             |
| AB             | 76.74          | 1  | 76.74       | 8.72    | 0.0213   |             |
| AC             | 13.99          | 1  | 13.99       | 1.59    | 0.2479   |             |
| BC             | 0.9604         | 1  | 0.9604      | 0.1091  | 0.7508   |             |
| A <sup>2</sup> | 62.78          | 1  | 62.78       | 7.13    | 0.0320   |             |
| B <sup>2</sup> | 337.01         | 1  | 337.01      | 38.28   | 0.0005   |             |
| C <sup>2</sup> | 588.41         | 1  | 588.41      | 66.84   | < 0.0001 |             |
| Residual       | 61.62          | 7  | 8.80        |         |          |             |
| Lack of Fit    | 51.39          | 3  | 17.13       | 6.70    | 0.0487   | significant |
| Pure Error     | 10.23          | 4  | 2.56        |         |          |             |
| Cor Total      | 1426.41        | 16 |             |         |          |             |

**Table S4.** ANOVA for Quadratic model for drug release.

| Source         | Sum of Squares | df | Mean Square | F-value | p-value |                 |
|----------------|----------------|----|-------------|---------|---------|-----------------|
| Model          | 1578.07        | 9  | 175.34      | 16.15   | 0.0007  | significant     |
| A-X1           | 80.71          | 1  | 80.71       | 7.43    | 0.0295  |                 |
| B-X2           | 169.37         | 1  | 169.37      | 15.60   | 0.0055  |                 |
| C-X3           | 64.30          | 1  | 64.30       | 5.92    | 0.0452  |                 |
| AB             | 3.74           | 1  | 3.74        | 0.3449  | 0.5755  |                 |
| AC             | 43.96          | 1  | 43.96       | 4.05    | 0.0841  |                 |
| BC             | 0.1600         | 1  | 0.1600      | 0.0147  | 0.9068  |                 |
| A <sup>2</sup> | 231.30         | 1  | 231.30      | 21.31   | 0.0024  |                 |
| B <sup>2</sup> | 437.35         | 1  | 437.35      | 40.29   | 0.0004  |                 |
| C <sup>2</sup> | 422.25         | 1  | 422.25      | 38.90   | 0.0004  |                 |
| Residual       | 75.99          | 7  | 10.86       |         |         |                 |
| Lack of Fit    | 57.62          | 3  | 19.21       | 4.18    | 0.1003  | not significant |
| Pure Error     | 18.37          | 4  | 4.59        |         |         |                 |
| Cor Total      | 1654.06        | 16 |             |         |         |                 |

**Table S5.** Predicted values for various dependent variables.

| Formulation | Dependent Variables          |                                     |                         |
|-------------|------------------------------|-------------------------------------|-------------------------|
|             | Particle size<br>(nm), $Y_1$ | Entrapment efficiency<br>(%), $Y_2$ | Drug release (%), $Y_3$ |
| NL1         | 331.65                       | 66.95                               | 68.43                   |
| NL2         | 378.11                       | 70.45                               | 68.16                   |
| NL3         | 295.02                       | 69.72                               | 67.47                   |
| NL4         | 392.36                       | 63.60                               | 60.71                   |
| NL5         | 179.58                       | 87.64                               | 88.56                   |
| NL6         | 279.37                       | 63.62                               | 70.32                   |
| NL7         | 364.25                       | 71.10                               | 66.78                   |
| NL8         | 179.58                       | 87.64                               | 88.56                   |
| NL9         | 463.86                       | 82.35                               | 79.70                   |
| NL10        | 307.25                       | 69.16                               | 75.59                   |
| NL11        | 179.58                       | 87.64                               | 88.56                   |
| NL12        | 278.20                       | 66.35                               | 71.41                   |
| NL13        | 179.58                       | 87.64                               | 88.56                   |
| NL14        | 179.58                       | 87.64                               | 88.56                   |
| NL15        | 446.19                       | 74.55                               | 68.56                   |
| NL16        | 414.53                       | 80.70                               | 80.46                   |
| NL17        | 465.87                       | 76.07                               | 64.14                   |
